# Supplementary material
Source: Springer Nature journal article supplement (https://www.springermedizin.de/resource/supplementary/13014_2009_220_MOESM1_ESM.pdf/9633214)

RA

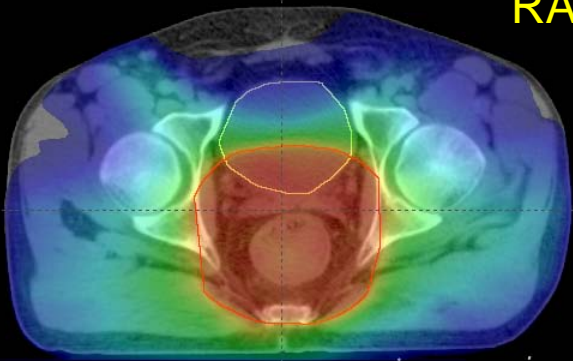

3DC

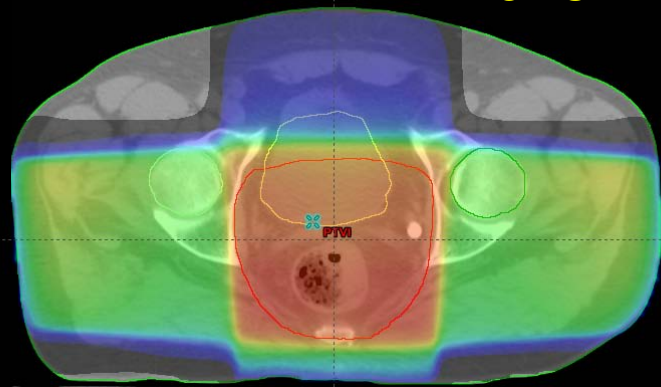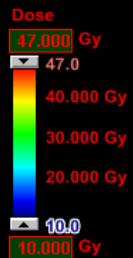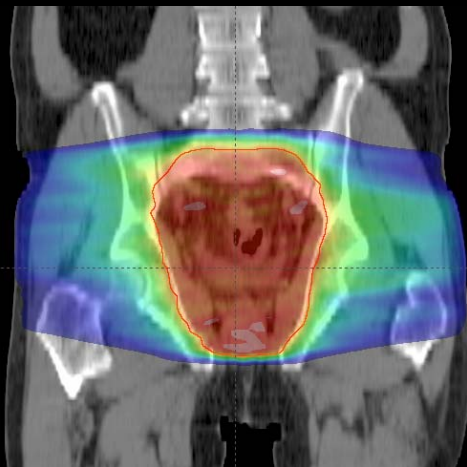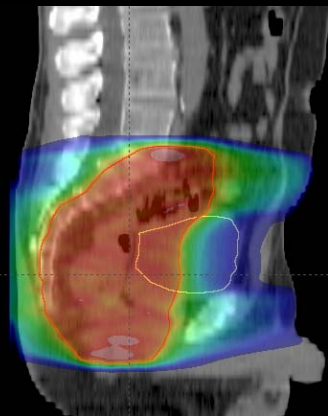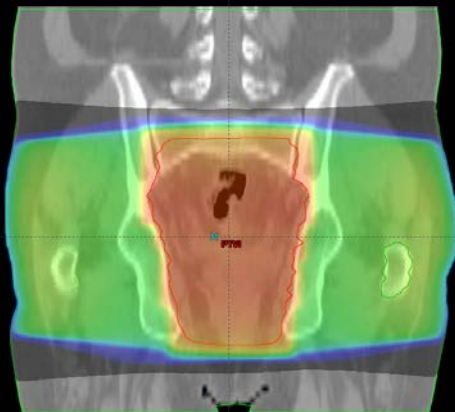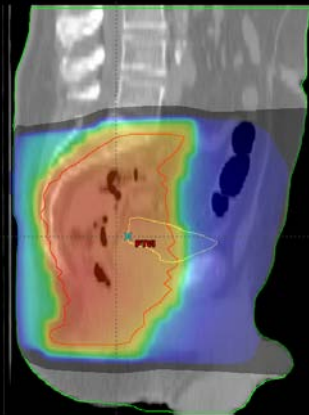

Supplement: MOESM1 [file 9633214]
